# Supplementary material for: High-fat diet intensifies MLL-AF9-induced acute myeloid leukemia through activation of the FLT3 signaling in mouse primitive hematopoietic cells
Source: PubMed Central journal article supplement (PMC7528010; doi:10.1038/s41598-020-73020-4), 2020-09-30
Supplement: 41598_2020_73020_MOESM1_ESM.pdf [file 41598_2020_73020_MOESM1_ESM.pdf]

# **High-fat diet intensifies *MLL-AF9*-induced acute myeloid leukemia through activation of the FLT3 signaling in mouse primitive hematopoietic cells**

François Hermetet,<sup>1,2,\*</sup> Rony Mshaik,<sup>1,\*</sup> John Simonet,<sup>1</sup> Patrick Callier,<sup>3</sup> Laurent Delva<sup>1,2</sup> and Ronan Quéré<sup>1,2</sup>

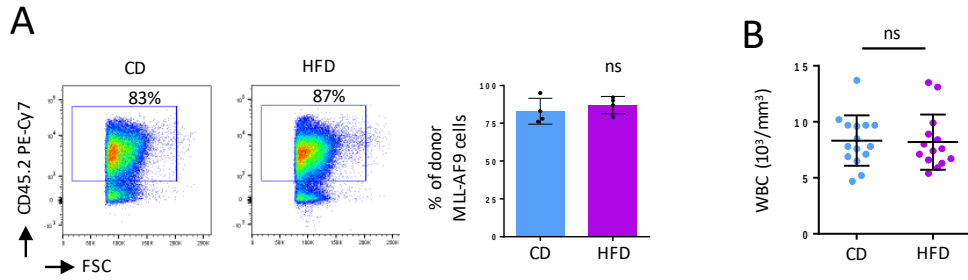

**Figure S1.** HFD did not alter engraftment of *MLL-AF9 knock-in* Ly.2 cells to the BM, as well as reconstitution of total white blood cells (WBC) in PB of recipient mice. **(A)** Flow cytometry showing similar engraftment of *MLL-AF9 knock in* cells (CD45.2 positive cells) in the BM of mice fed with either a CD or a HFD. Experiment done on the BM, after 4 weeks of CD or HFD, n=4 mice per diet group. Data were analyzed using FlowJo (version 10, TreeStar Inc, <https://www.flowjo.com/>, under the license number S13Q5La2Ft1g6ARY). **(B)** After 4 weeks, HFD did not alter the reconstitution of WBC in PB of recipient mice, compared with CD. One mouse from the HFD group had developed AML, after 4 weeks (see **Fig. 1B**) and was therefore not included in this analysis. Data show mean  $\pm$  SD; n=15 and 14 mice for CD and HFD groups, respectively; *P* value measured by two-tailed unpaired Student's t-test; ns, non-significant.

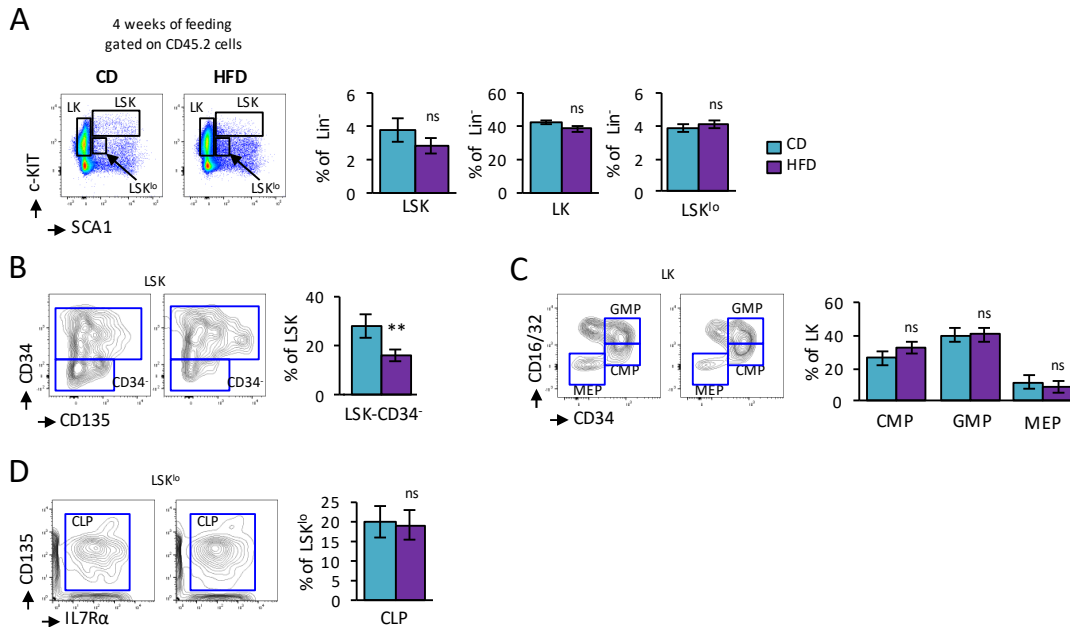

**Figure S2.** Flow cytometry analyses showing the main changes observed among the populations of primitive HSPC following a HFD. **(A)** Flow cytometry analysis on lineage negative (Lin<sup>-</sup>) SCA1<sup>+</sup> c-KIT<sup>+</sup> (LSK), Lin<sup>-</sup> SCA1<sup>-</sup> c-KIT<sup>+</sup> (LK) and Lin<sup>-</sup> SCA1<sup>+</sup> c-KIT<sup>lo</sup> (LSK<sup>lo</sup>) cells. **(B)** Flow cytometry analysis showing a decreased number of primitive HSC (LSK CD34<sup>-</sup>) among LSK cells from HFD-fed mice compared to CD-fed mice. **(C)** Flow cytometry analysis on LK showing no variation in the number of mature progenitors such as mega-erythroid progenitor (MEP), common myeloid progenitor (CMP), granulocyte/macrophage progenitor (GMP). **(D)** No variability is furthermore observed among the common lymphoid progenitor (CLP) following a HFD feeding. On this figure, flow cytometry analysis was performed on Lin<sup>-</sup> CD45.2<sup>+</sup> *MLL-AF9 knock-in* BM cells, after depletion of Lin<sup>+</sup> BM cells, and after 4 weeks of feeding mice with CD (n=3 mice) or HFD (n=3 mice). Data were analyzed using FlowJo software (version 10, TreeStar Inc, <https://www.flowjo.com/>, under the license number S13Q5La2Ft1g6ARY). Data show mean

± SD; *P* value measured by two-tailed unpaired Student's *t*-test; \*\*, *P*<0.01; ns, non-significant.

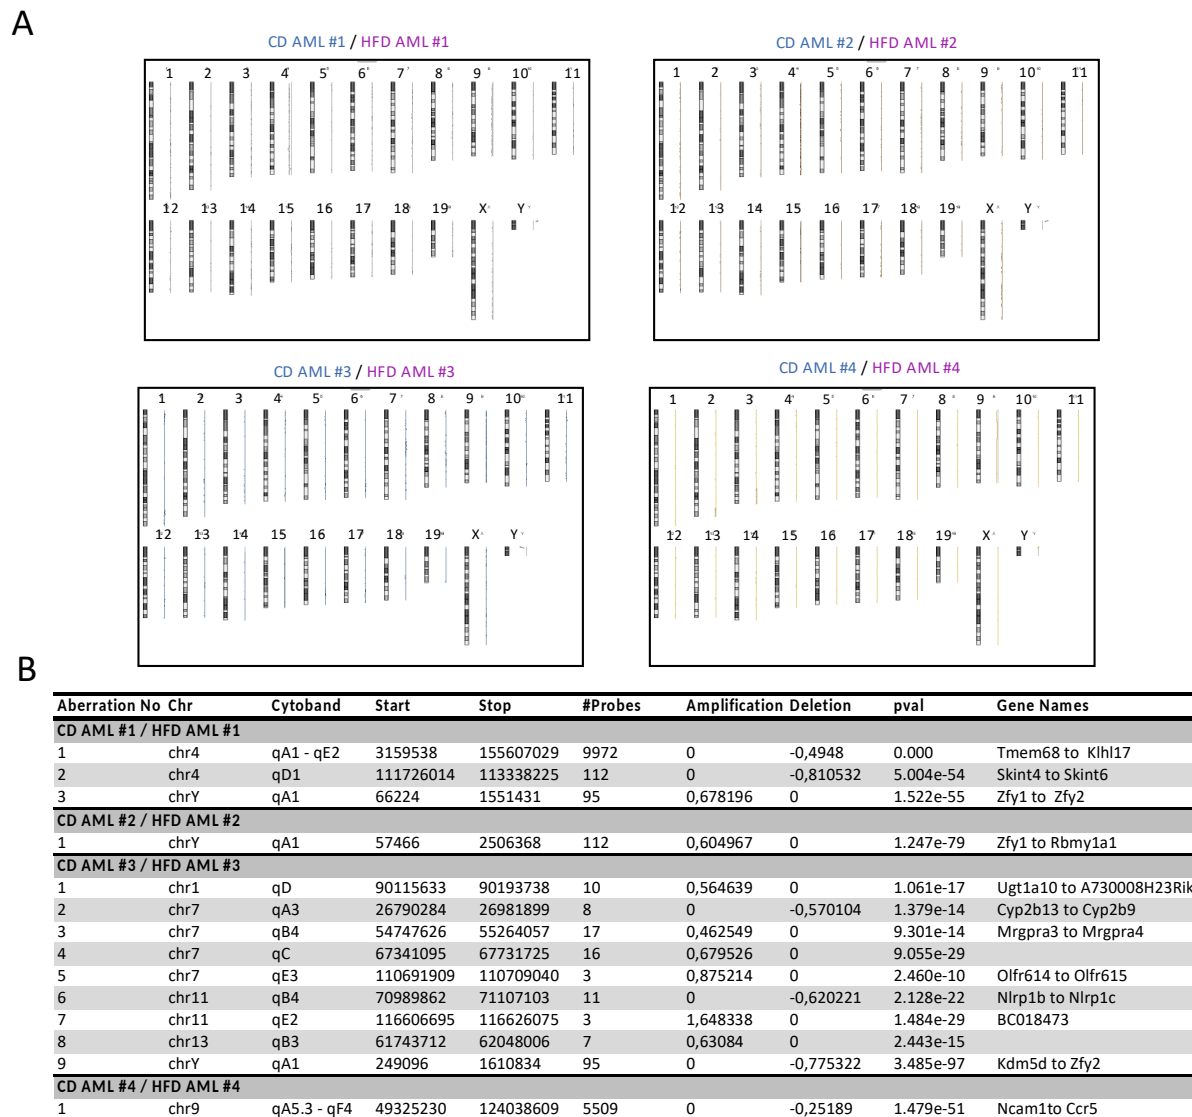

**Figure S3.** CGH-array analysis showing that there was no significant genetic alteration in DNA isolated from post-HFD AML cells when compared with post-CD AML cell samples. CGH-arrays were performed on 4 DNA (#1-4) isolated from post-CD and HFD AML. **(A)** Chromosomes of the CGH-arrays. Images were processed using the Agilent Cytogenomics software (version 2.7, Agilent Technologies, <https://www.agilent.com/en/download-agilent-cytogenomics-software>). **(B)** Main genetic aberrations observed by CGH-array analysis.

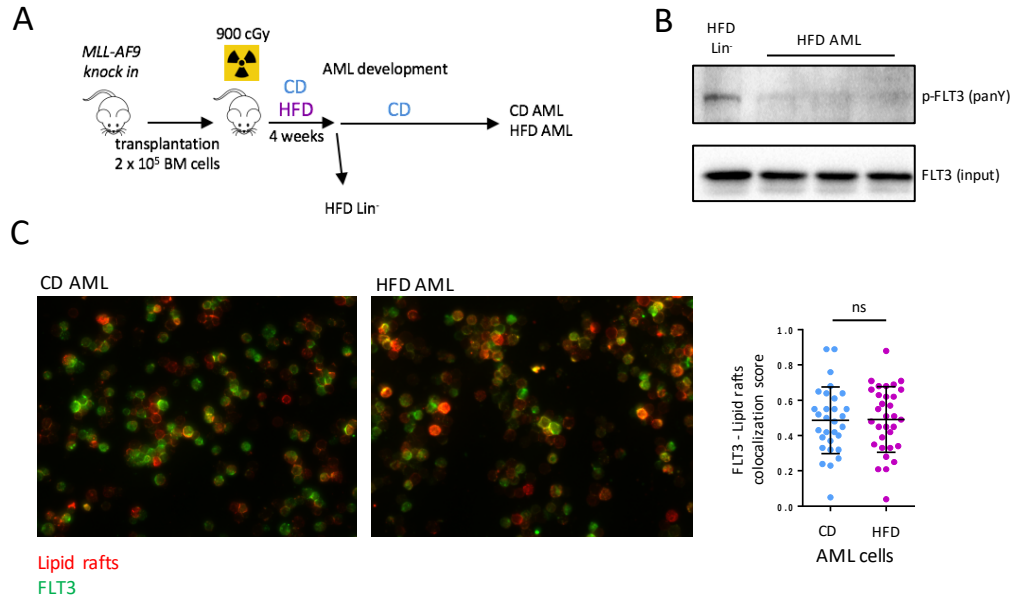

**Figure S4.** Experiments displaying that AML cells are not showing activation of FLT3. **(A)** Experimental workflow describing the procedure. Image performed with the GIMP software (version 2.10.18, GIMP, <https://www.gimp.org/news/2020/02/24/gimp-2-10-18-released/>). To obtain post-HFD AML samples, HFD was only provided to the mice for 4 weeks and was replaced by CD several weeks before the occurrence of AML. **(B)** Western blot showing no phosphorylation (pan tyrosine; pan Y) of FLT3 among post-HFD AML cells (HFD AML) isolated from 3 mice, compared with Lin<sup>-</sup> cells isolated from a mouse fed with a HFD during 4 weeks and sacrificed just after the HFD (HFD Lin<sup>-</sup>). Grouping of blots cropped from different gels, see Supplementary Fig. S9 for full-length blots. Images were processed using Fiji software (NIH). **(C)** Microscopy showing no colocalization between lipid rafts (stained with AF555-conjugated cholera toxin subunit B, red) and FLT3 (stained with anti-FLT3 antibody and anti-rabbit-AF488 antibody, green). Representative immunostaining for post-CD and HFD AML cells is shown on the left. Images were obtained using Axio Imager 2 (Zeiss) and the images were processed with Fiji software (NIH). Graphic on the right showing the colocalization score between lipid rafts and FLT3 on single cells ( $n > 30$  cells).  $P$  value measured by two-tailed unpaired Student's t-test; ns, non-significant.

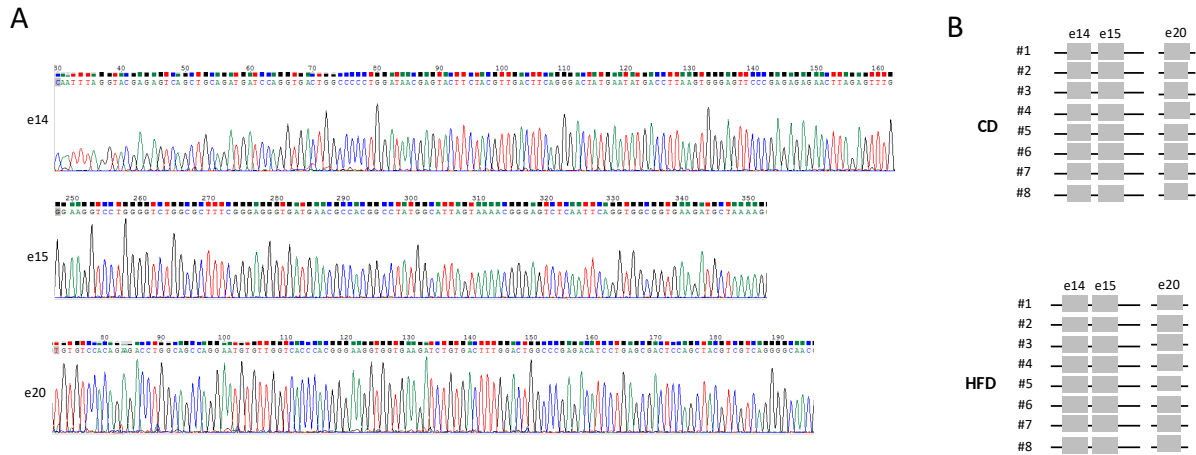

**Figure S5.** On DNA extracted from post-CD and -HFD AML cells (n=8 samples analyzed per group), no mutation or duplication were observed in exon 14 (e14), exon 15 (e15) and exon 20 (e20) of the *Flt3* gene. **(A)** Data showing representative result of Sanger sequencing performed on one post-HFD AML sample; no heterozygote mutation was detected. Images were created using Chromas (2.6.6) software (Technelysium, <http://technelysium.com.au/wp/chromas/>). **(B)** Sanger sequencing performed on DNA purified from 8 post-CD and 8 post-HFD AML cells (#1-8). Grey square is for DNA from BM cells of wild type mouse, without any heterozygote mutation detected by Sanger sequencing.

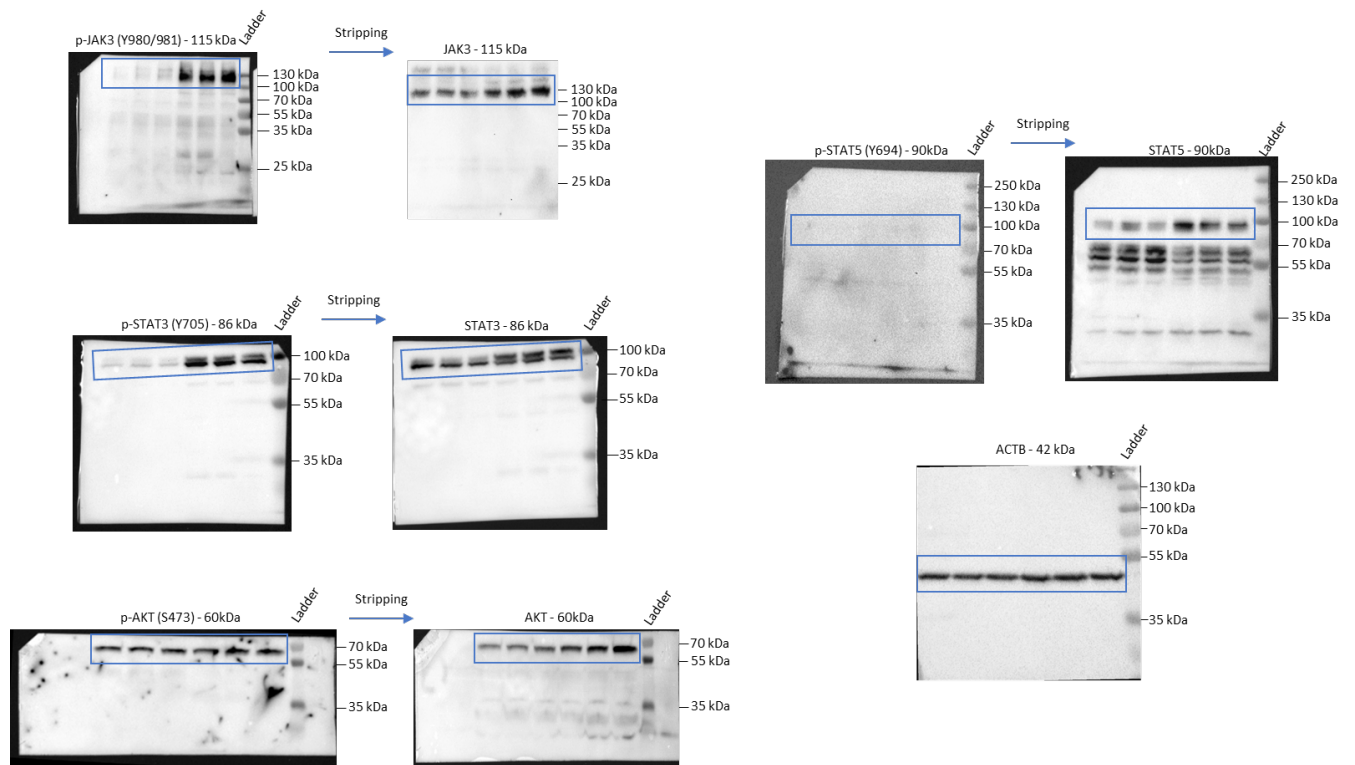

**Figure S6.** Full-length blots corresponding to Fig. 3A. For the p-AKT and AKT blots, acrylamide gels were cut prior to transfer on PVDF membranes.

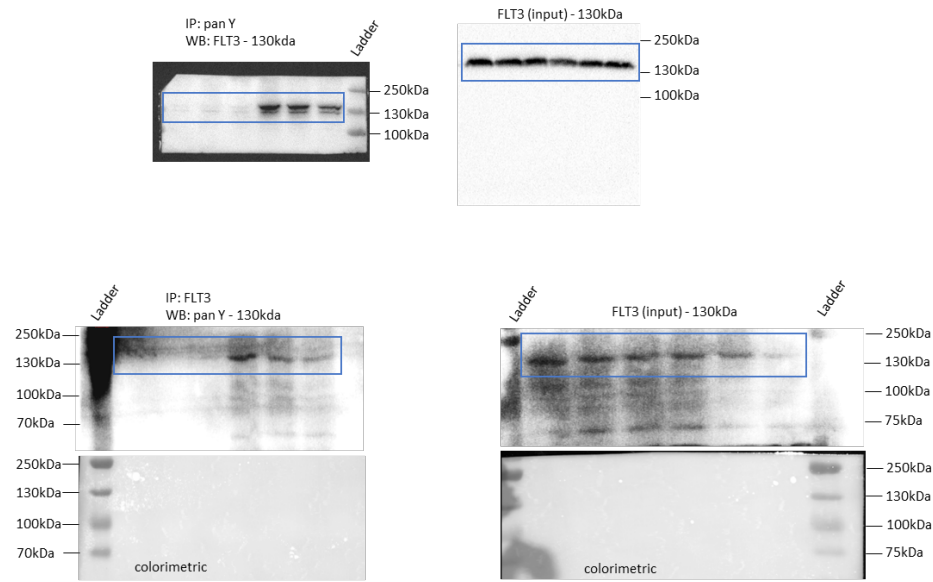

**Figure S7.** Full-length blots corresponding to Fig. 3B. For the blots, acrylamide gels were cut prior to transfer on PVDF membranes.

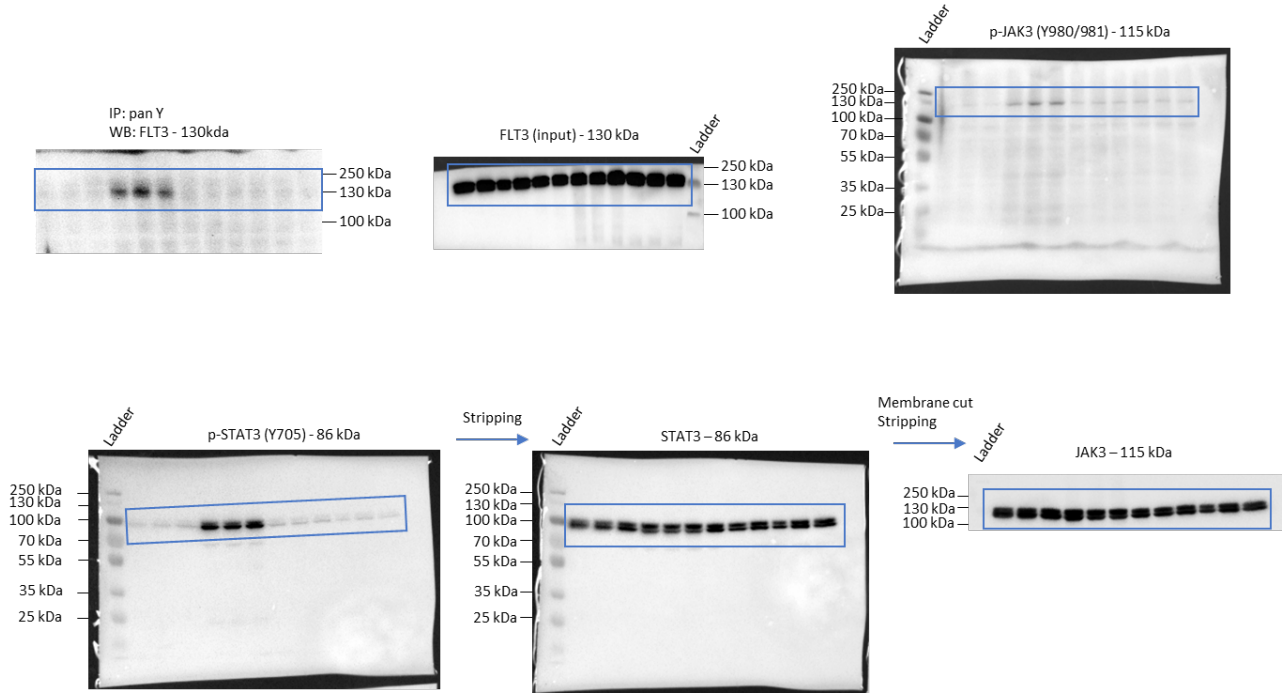

**Figure S8.** Full-length blots corresponding to Fig. 4B. For the FLT3 blots, acrylamide gels were cut prior to transfer on PVDF membranes. For the JAK3 blot, the membrane was cut prior to staining with the anti-JAK3 antibody.

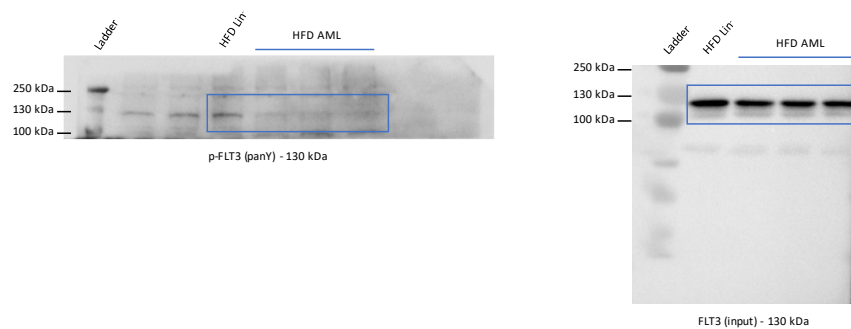

**Figure S9.** Full-length blots corresponding to Supplementary Fig. S4. For the p-FLT3 blot, acrylamide gel was cut prior to transfer on PVDF membrane.
